# Supplementary material for: Neuromodulation for Cannabis Use: A Scoping Review
Source: MDPI journal article supplement (doi:10.3390/brainsci14040356), 2024-04-02
Supplement: s1 [file s1]

**Supplementary Table S1: PubMed search strategy**

| Search # | Query                                                                                                                                                                                                                                   | Items Found |
|----------|-----------------------------------------------------------------------------------------------------------------------------------------------------------------------------------------------------------------------------------------|-------------|
| 1        | "cannabis use dis*" or "cannabis add*" or "cannabis use*" or "cannabis abuse"                                                                                                                                                           | 10,578      |
| 2        | "marijuana add*" or "Marijuana Abuse"[Mesh] or "marijuana use"                                                                                                                                                                          | 12,596      |
| 3        | 1 OR 2                                                                                                                                                                                                                                  | 19,491      |
| 4        | "brain stimulation" or "neuromodulation" or "neurostimulation"                                                                                                                                                                          | 43,693      |
| 5        | "Deep Brain Stimulation"[MeSH] or "DBS" or "Deep Brain Stimulation"                                                                                                                                                                     | 22,034      |
| 6        | "Transcranial Magnetic Stimulation"[MeSH] or "Vagus Nerve Stimulation"[MeSH] or "TMS" or "rTMS" or "TBS" or "VNS" or "Transcranial magnetic stimulation" or "Repetitive transcranial magnetic stimulation" or "Theta Burst Stimulation" | 36,104      |
| 7        | "Electroconvulsive Therapy"[MeSH] or "Transcranial Direct Current Stimulation"[MeSH] or "ECT" or "tDCS" or "Electroconvulsive therapy" or "Transcranial Direct Current Stimulation"                                                     | 28,327      |
| 8        | "Electric Stimulation Therapy"[MeSH] or "Nerve Stimulation"                                                                                                                                                                             | 110,878     |
| 9        | "Extracorporeal Shockwave Therapy"[MeSH] or "Focused Ultrasound"                                                                                                                                                                        | 9,214       |
| 10       | 4 OR 5 OR 6 OR 7 OR 8 OR 9                                                                                                                                                                                                              | 194,510     |
| 11       | 3 AND 10                                                                                                                                                                                                                                | 49          |

**Supplementary Table S2: OVID Medline search strategy**

| Search # | Query                                                                                                                   | Items Found |
|----------|-------------------------------------------------------------------------------------------------------------------------|-------------|
| 1        | exp Cannabis/ or cannabis*.mp. or cannabinoids*.mp or exp Cannabinoids/                                                 | 45,710      |
| 2        | marijuana*.mp. or exp Marijuana Smoking/ or exp Marijuana Abuse/ or exp "Marijuana Use"/                                | 24,676      |
| 3        | 1 OR 2                                                                                                                  | 56,270      |
| 4        | (Neuromodulation adj1 (intervention* or treatment* or therap*)).mp. or brain stimulation*.mp.                           | 24,330      |
| 5        | exp Deep Brain Stimulation/ or DBS.mp. or Deep Brain Stimulation.mp                                                     | 21,097      |
| 6        | exp Transcranial Magnetic Stimulation/ or rtms.mp. or Transcranial Magnetic Stimulation.mp                              | 21,682      |
| 7        | tdcs.mp. or exp Transcranial Direct Current Stimulation/ or Transcranial Magnetic Stimulation.mp                        | 27,517      |
| 8        | exp Electroconvulsive Therapy/ or ect.mp. or Electroconvulsive Therapy.mp                                               | 20,099      |
| 9        | exp Vagus Nerve Stimulation/ or exp Electric Stimulation/ or nerve stimulation.mp. or exp Electric Stimulation Therapy/ | 230,072     |
| 10       | focused ultrasound.mp. or exp Ultrasonic Therapy/                                                                       | 18,091      |
| 11       | 4 or 5 or 6 or 7 or 8 or 9 or 10                                                                                        | 295,549     |
| 12       | 3 AND 11                                                                                                                | 481         |

Supplementary Table S3: Psychinfo search strategy

| Search # | Query                                                                                                      | Items Found |
|----------|------------------------------------------------------------------------------------------------------------|-------------|
| 1        | exp "Cannabis Use Disorder"/ or exp Cannabis/ or cannabis*.mp.<br>or cannabinoids.mp. or exp Cannabinoids/ | 25,055      |
| 2        | exp Marijuana/ or exp Marijuana Usage/ or marijuana*.mp.                                                   | 16,689      |
| 3        | 1 OR 2                                                                                                     | 30,729      |
| 4        | exp Neuromodulation/ or neuromodulation*.mp. or exp Brain<br>Stimulation/ or brain stimulation*.mp.        | 31,065      |
| 5        | exp Deep Brain Stimulation/ or dbs.mp. or Deep brain<br>stimulation.mp                                     | 6090        |
| 6        | exp Transcranial Magnetic Stimulation/ or tms.mp. or<br>Transcranial Magnetic Stimulation.mp               | 13,459      |
| 7        | exp Transcranial Direct Current Stimulation/ or tdcS.mp or<br>Transcranial Direct Current Stimulation.mp   | 4392        |
| 8        | exp Electroconvulsive Shock Therapy/ or ect.mp. or<br>Electroconvulsive Therapy.mp                         | 11,417      |
| 9        | exp Vagus Nerve/ or exp Nerve Stimulation/ or exp Electrical<br>Stimulation/ or nerve stimulation*.mp.     | 29,248      |
| 10       | exp Ultrasound/ or focused ultrasound.mp.                                                                  | 2031        |
| 11       | 4 or 5 or 6 or 7 or 8 or 9 or 10                                                                           | 54,795      |
| 12       | 3 AND 11                                                                                                   | 202         |
